# Supplementary material for: Aberrant Expression of RAD52, Its Prognostic Impact in Rectal Cancer and Association with Poor Survival of Patients
Source: MDPI journal article supplement (doi:10.3390/ijms21051768), 2020-03-04
Supplement: s1 [file s1]

# Supplementary Materials: Aberrant expression of RAD52 associated with poor survival of patients and its prognostic impact in rectal cancer

Vincent Ho, Liping Chung, Amandeep Singh, Vivienne Lea, Askar Abubakar, Stephanie H Lim, Wei Chua, Weng Ng, Mark Lee, Tara Roberts, Paul de Souza, and Cheok Soon Lee

Supplementary Table S1 Treatment received by patients with rectal cancer

|   | Preoperative |           |              | Postoperative |               | Pre/Post-operative        |                     | Surgery alone | Unknown |
|---|--------------|-----------|--------------|---------------|---------------|---------------------------|---------------------|---------------|---------|
|   | Neo RT       | Neo Chemo | Neo Chemo-RT | Adj. Chemo    | Adj. Chemo-RT | Neo Chemo-RT + Adj. Chemo | Neo RT + Adj. Chemo |               |         |
| n | 40           | 22        | 20           | 34            | 3             | 11                        | 6                   | 65            | 24      |

\*Available study subjects (n=179) at the Liverpool Hospital. Neo, neoadjuvant; Adj., adjuvant; RT, radiotherapy; Chemo, chemotherapy

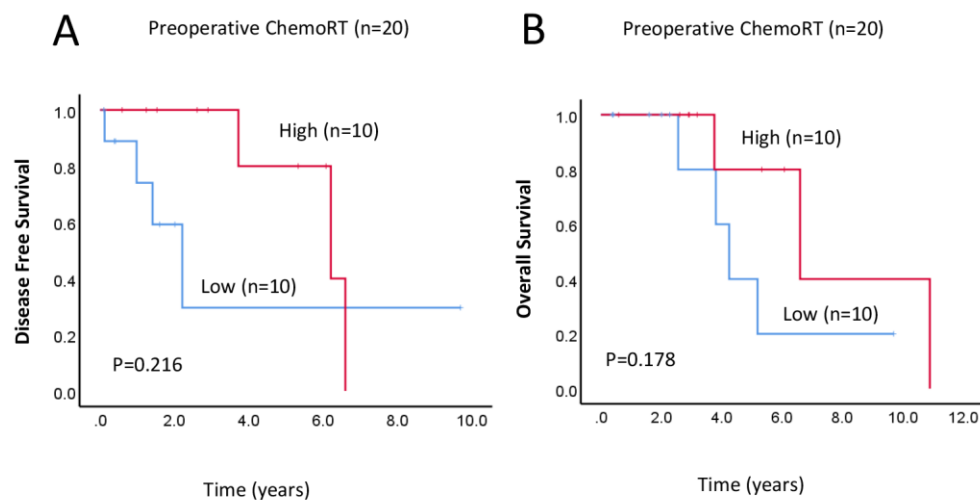

**Supplementary Figure S1. Kaplan–Meier survival analysis in patients treated with chemo-radiotherapy.** Relationship between RAD52 expression and disease-free survival (A) and overall survival (B) in chemo-radiotherapy treated rectal cancer patients.
